# Supplementary material for: Effect of vapor pressure on performance of sulfurized polyacrylonitrile cathodes for Li/S batteries
Source: Royal Society of Chemistry journal article supplement (doi:10.1039/c6ra24443b), 2016-01-01
Supplement: c6ra24443b1.pdf [file c6ra24443b1.pdf]

## SUPPLEMENTARY INFORMATION

### Effect of vapor pressure on performance of sulfurized polyacrylonitrile cathodes for Li/S batteries

Yonggang Liu,<sup>ab</sup> Weikun Wang,<sup>\*b</sup> Anbang Wang,<sup>\*b</sup> Zhaoqing Jin,<sup>b</sup> Hailei Zhao,<sup>a</sup> and Yu sheng Yang<sup>b</sup>

<sup>a</sup> School of Materials Science and Engineering, University of Science and Technology Beijing, Beijing 100083, China

<sup>b</sup> Research Institute of Chemical Defense, Beijing 100191, China

\*E-mail: wangweikun2002@163.com; wab\_wang2000@aliyun.com

**Table SI-1** Characteristics of various sulfurized polyacrylonitrile composites reported in literatures

| Material <sup>Reference</sup>                             | S content of material | Cycle performance,<br>1C=1.675A/g                   |
|-----------------------------------------------------------|-----------------------|-----------------------------------------------------|
| S/PAN/Graphene <sup>18</sup>                              | 47.3%                 | 0.1C, 100 cycles<br>471mAh/g <sub>-composite</sub>  |
| pPAN-S/GNS <sup>19</sup>                                  | 47%                   | 0.1C, 100 cycles<br>564mAh/g <sub>-composite</sub>  |
| SPAN/RGO <sup>20</sup>                                    | 44 %                  | 0.1C, 100 cycles<br>548mAh/g <sub>-composite</sub>  |
| S/PAN/Mg <sub>0.6</sub> Ni <sub>0.4</sub> O <sup>21</sup> | 38.5%                 | 0.1C, 100 cycles<br>451mAh/g <sub>-composite</sub>  |
| PAN-S-VA <sup>22</sup>                                    | 36.89%                | 0.25C, 200 cycles<br>477mAh/g <sub>-composite</sub> |
| S-PAN <sup>23</sup>                                       | 42%                   | 0.2C, 100 cycles<br>441mAh/g <sub>-composite</sub>  |

**Table SI-2** Surface area of S@pPAN composites

| Samples                         | S@pPAN-0 | S@pPAN-2 | S@pPAN-5 | S@pPAN-8 |
|---------------------------------|----------|----------|----------|----------|
| surface area(m <sup>2</sup> /g) | 13.22    | 15.47    | 22.86    | 20.53    |
